# Supplementary material
Source: publisher site journal article supplement (https://www.kjim.org/upload/media/kjim-2022-104-suppl4.pdf)
Supplement: Supplementary file 1 [file kjim-2022-104-suppl4.pdf]

**Supplementary Table 4. Safety event after medication between experimental drug (DW1601) and control (DW16011 or *Pe/argonium sidoides*)**

| Variable                    | DW1601 (n = 68) | DW16011 (n = 70) | <i>P. sidoides</i> (n = 64) | <i>p</i> value <sup>a</sup> | <i>p</i> value <sup>b</sup> |
|-----------------------------|-----------------|------------------|-----------------------------|-----------------------------|-----------------------------|
| TEAE                        | 5 (7.5)         | 6 (8.6)          | 6 (9.2)                     | 0.811                       | 0.713                       |
| Dry mouth                   | 2 (3.0)         | 1 (1.4)          | 0                           |                             |                             |
| Nausea                      | 1 (1.5)         | 0                | 1 (1.5)                     |                             |                             |
| Dyspepsia                   | 0               | 0                | 1 (1.5)                     |                             |                             |
| Gastritis                   | 0               | 0                | 1 (1.5)                     |                             |                             |
| Somnolence                  | 1 (1.5)         | 3 (4.3)          | 2 (3.1)                     |                             |                             |
| Dizziness                   | 0               | 1 (1.4)          | 0                           |                             |                             |
| Face edema                  | 1 (1.5)         | 1 (1.4)          | 0                           |                             |                             |
| Pyrexia                     | 0               | 0                | 1 (1.5)                     |                             |                             |
| Upper respiratory infection | 0               | 0                | 1 (1.5)                     |                             |                             |
| Nasal dryness               | 0               | 1 (1.4)          | 0                           |                             |                             |
| ADR                         | 4 (6.0)         | 6 (8.6)          | 4 (6.2)                     | 0.559                       | 0.965                       |
| Dry mouth                   | 2 (3.0)         | 1 (1.4)          | 0                           |                             |                             |
| Nausea                      | 1 (1.5)         | 0                | 1 (1.5)                     |                             |                             |
| Dyspepsia                   | 0               | 0                | 1 (1.5)                     |                             |                             |
| Somnolence                  | 1 (1.5)         | 3 (4.3)          | 2 (3.1)                     |                             |                             |
| Dizziness                   | 0               | 1 (1.4)          | 0                           |                             |                             |
| Nasal dryness               | 0               | 1 (1.4)          | 0                           |                             |                             |
| SAE                         | 0               | 0                | 0                           | NA                          | NA                          |
| SADR                        | 0               | 0                | 0                           | NA                          | NA                          |

Values are presented as number (%).

TEAE, treatment-emergent adverse event; ADR, adverse drug reaction; SAE, serious adverse event; SADR, serious adverse drug reaction; NA, not applicable.

<sup>a</sup>*p* value was calculated using Pearson's chi-square test for the difference of score between DW1601 and DW16011 groups.

<sup>b</sup>*p* value was calculated using Pearson's chi-square test for the difference of score between DW1601 and *P. sidoides* groups.
